# Supplementary material for: High fidelity visualization of cell-to-cell variation and temporal dynamics in nascent extracellular matrix formation
Source: PubMed Central journal article supplement (PMC5150986; doi:10.1038/srep38852), 2016-12-12
Supplement: srep38852-s1.pdf [file srep38852-s1.pdf]

## Supplementary Info:

High fidelity visualization of cell-to-cell variation and temporal dynamics in nascent extracellular matrix formation

Claire M McLeod<sup>1,2,3</sup> & Robert L Mauck<sup>1,2,3\*</sup>

<sup>1</sup> Department of Bioengineering, University of Pennsylvania, Philadelphia, PA 19104, USA

<sup>2</sup> McKay Orthopaedic Research Laboratory, Department of Orthopaedic Surgery, Perelman School of Medicine, University of Pennsylvania, Philadelphia, PA 19104, USA

<sup>3</sup> Translational Musculoskeletal Research Center, Philadelphia VA Medical Center, Philadelphia, PA 19104, USA.

**\*Contact information:**

Robert L. Mauck, Ph.D.

McKay Orthopaedic Research Laboratory

Department of Orthopaedic Surgery

University of Pennsylvania

Philadelphia PA 19104

T: 215-898-3294; F: 215-573-2133

[lemauck@mail.med.upenn.edu](mailto:lemauck@mail.med.upenn.edu)

**Movie S1:** 3D reconstruction of the nascent matrix formed by a chondrocyte continuously labeled with HPG for 9 days. Reconstruction depicts a 5  $\mu\text{m}$  thick confocal stack, colored by depth, taken near the cell midplane. Fibrous structures project outwards from the cell and extend through multiple z-planes.

**Movie S2:** 3D reconstruction of the nascent matrix formed by a chondrocyte continuously labeled with HPG for 9 days. Reconstruction depicts a 5  $\mu\text{m}$  thick confocal stack, colored by depth, taken below the cell body. Fibrous structures form a mesh network, and many are vertically oriented (emanating from the cell body).

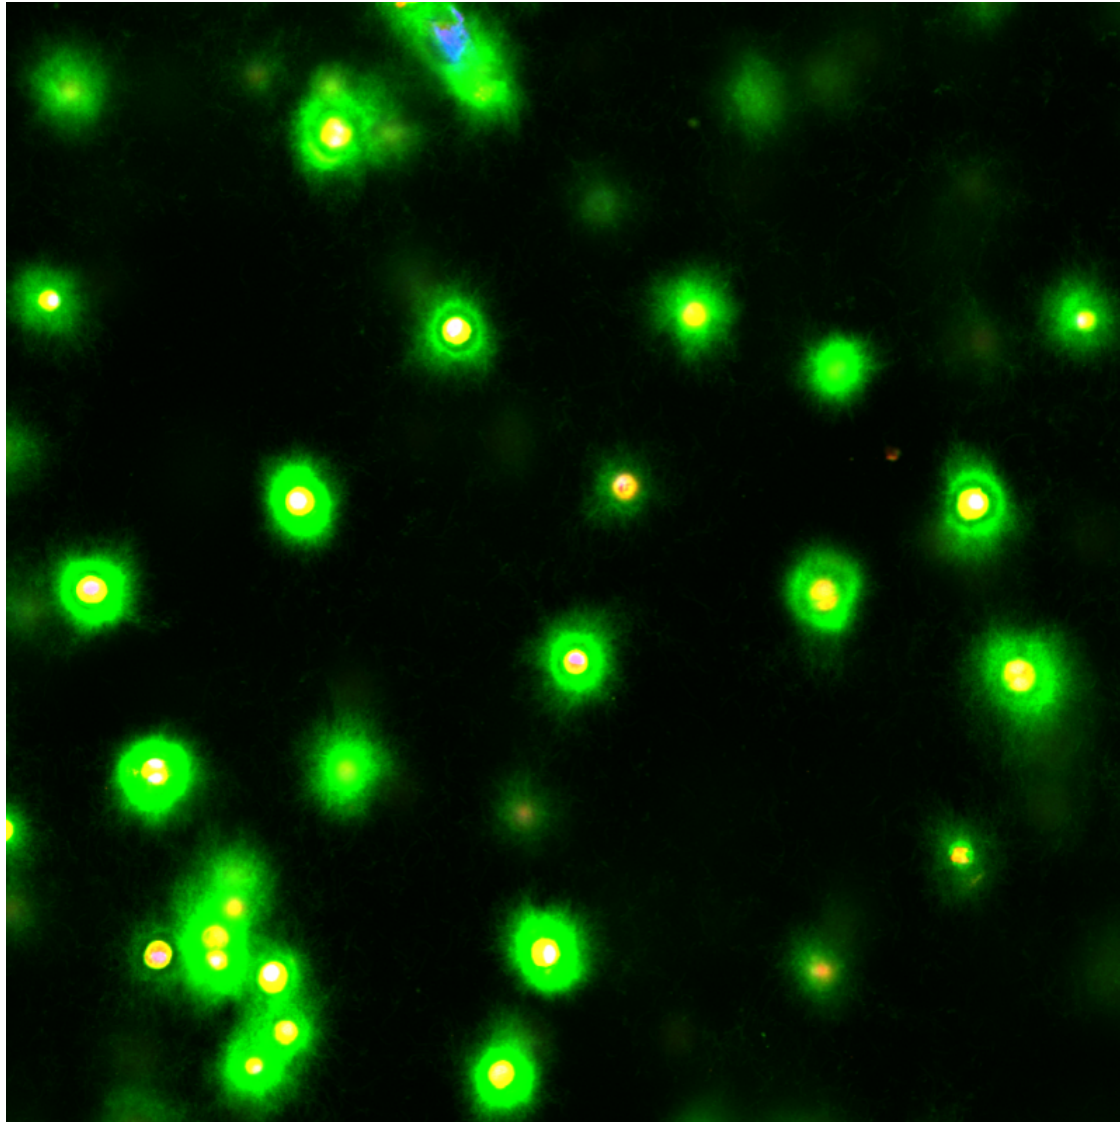

HPG

Cell Membrane

Nuclei

100  $\mu$ m

**Figure S1: Large area scans confirm uniform labeling across gel.** Chondrocytes in agarose, cultured in HPG labeling media for 9 days. Scan taken at 40X,  $\sim 50 \mu$ m into the gel.

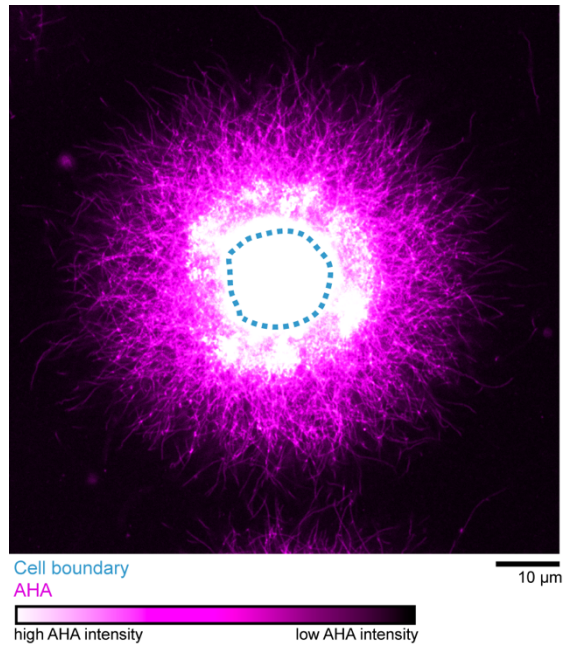

**Figure S2: Matrix labeling with azidohomoalanine (AHA).** Mid-plane confocal cross-section of a chondrocyte cultured in AHA labeling media for 7 days and tagged with Alexa Fluor 594-alkyne.

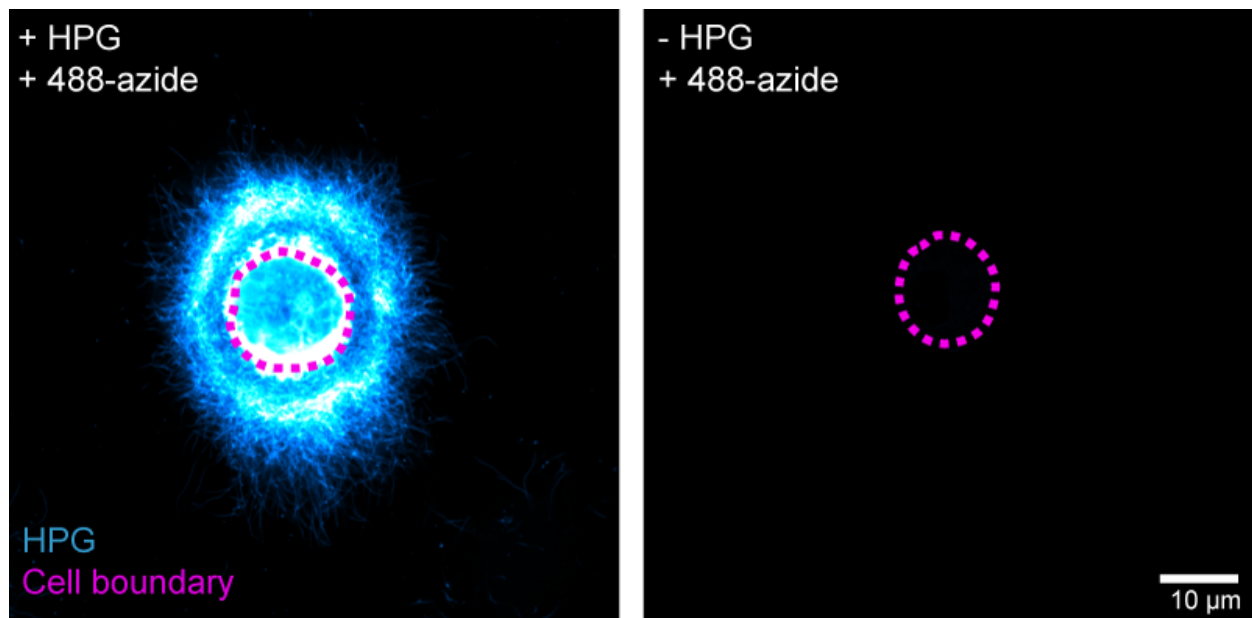

**Figure S3: Fluorescent tagging of HPG is highly specific.** Mid-plane confocal cross-sections of two chondrocytes, cultured in either labeling media (with HPG, left) or control methionine media (no HPG, right) for 9 days, and fluorescently tagged with 488-azide.

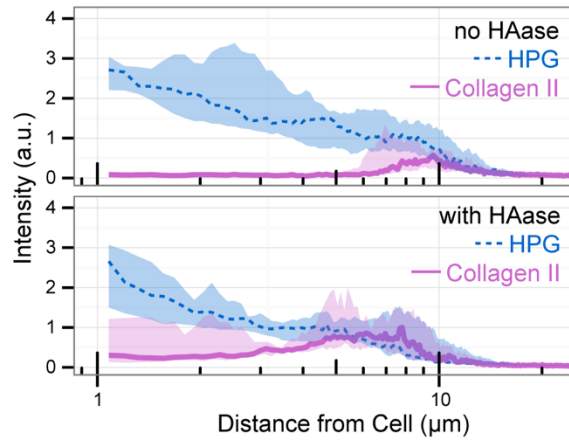

**Figure S4: Hyaluronidase digestion of fixed samples increases collagen II detection by immunofluorescence, but does not alter HPG labeling.** Radial intensity profiles for chondrocytes cultured in agarose and labeled with HPG for 9 days. Following fixation, samples were incubated in either PBS (control) or hyaluronidase before immunostaining and HPG tagging. Lines represent median intensity profile, shaded areas represent 25<sup>th</sup> to 75<sup>th</sup> percentiles (n = 9-11 cells/group).

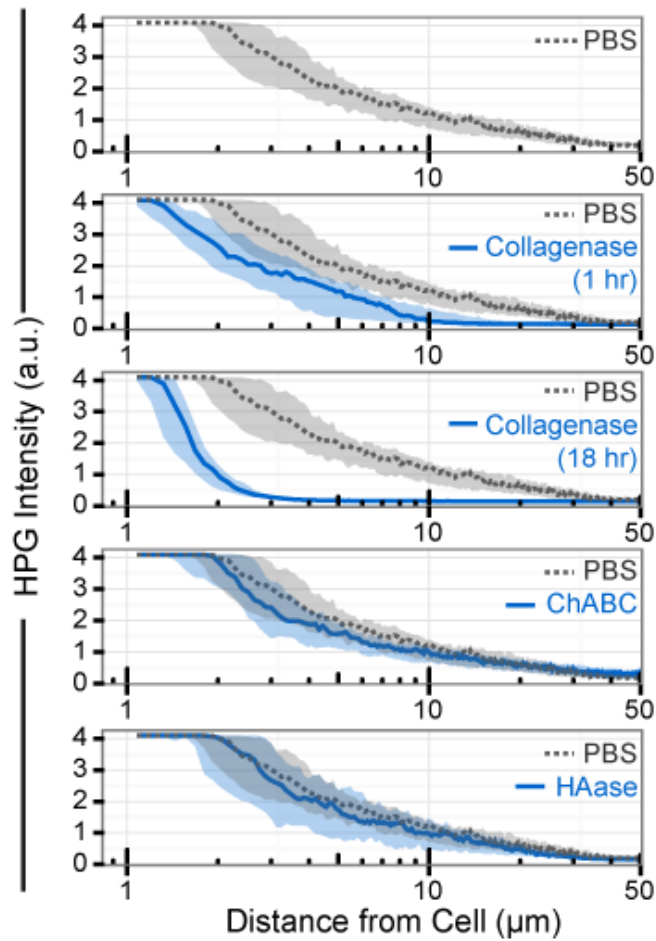

**Figure S5: Additional plots quantifying enzymatic of HPG-labeled matrix.** Data from Fig 2c, re-visualized with  $\log(\text{distance})$  on the x-axis. Radial profile quantification of HPG intensity following digestion, compared to constructs incubated in PBS. Lines represent median intensity profile, shaded areas represent 25<sup>th</sup> to 75<sup>th</sup> percentiles ( $n = 20$  cells/group).

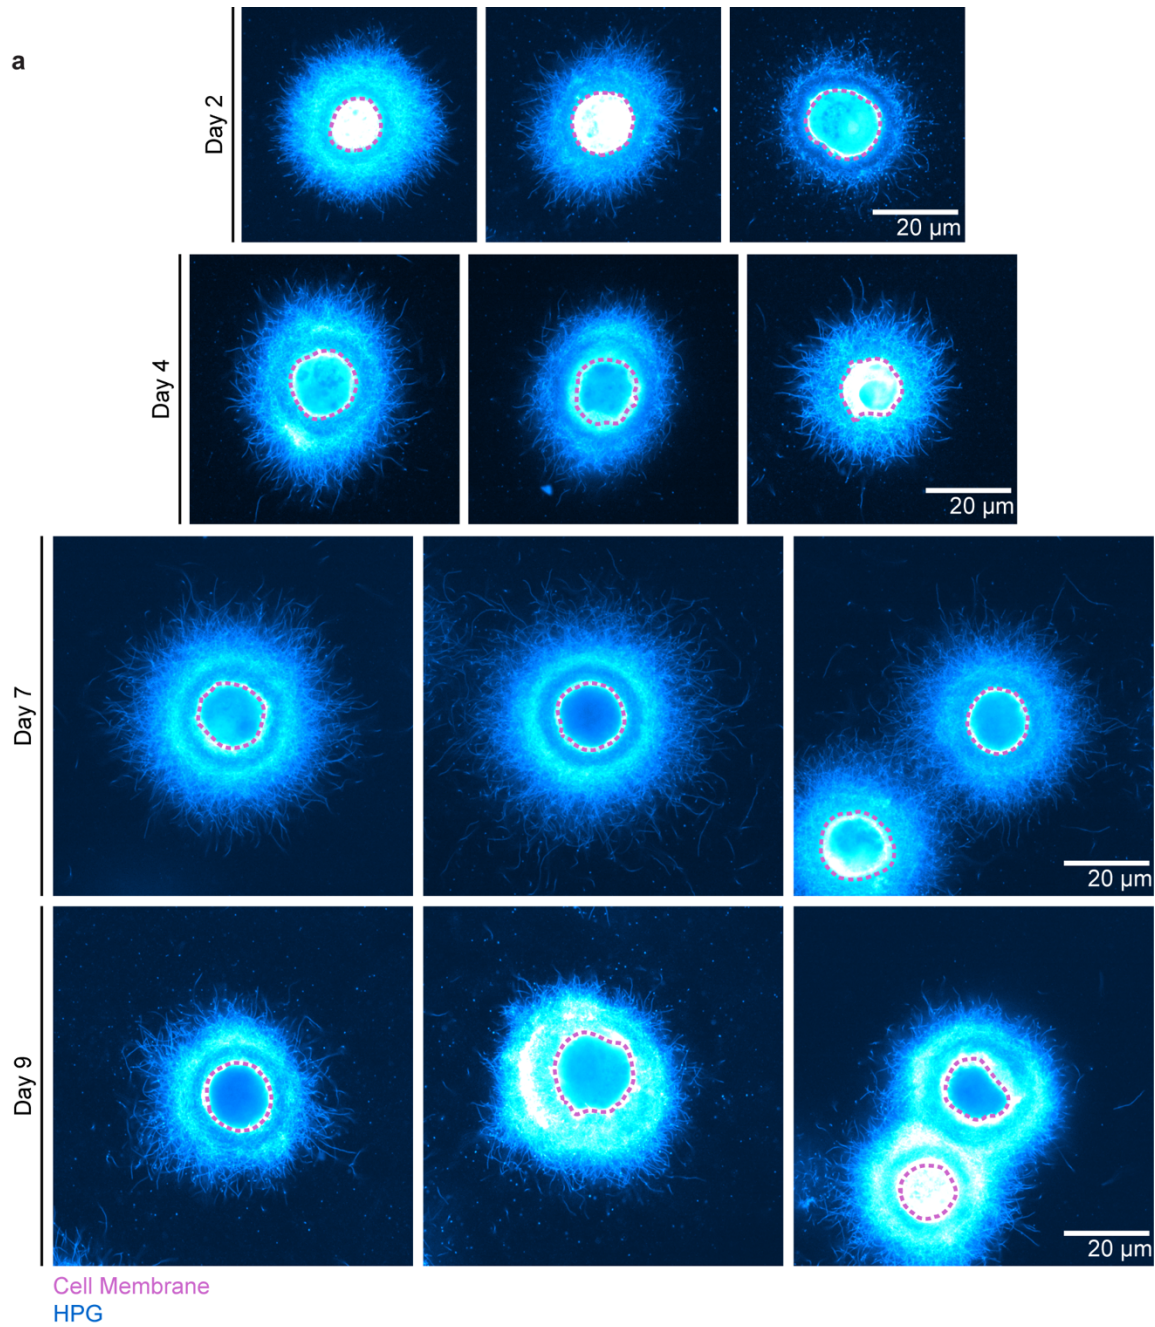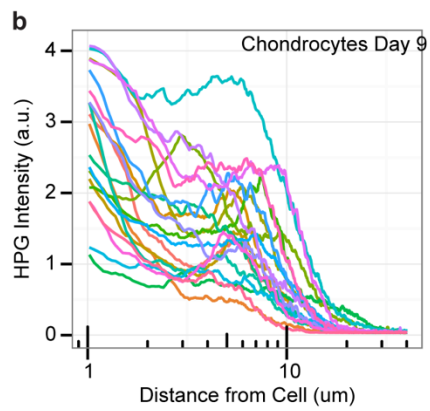



**Figure S6: Cell-to-cell heterogeneity in HPG-labeled nascent matrix formed by chondrocytes.** (a) A panel of representative chondrocytes cultured in agarose and labeled with HPG for up to 9 days. Colormap and scale bar are consistent across all images. (b) Radial intensity profiles for 20 individual chondrocytes cultured and labeled for 9 days.

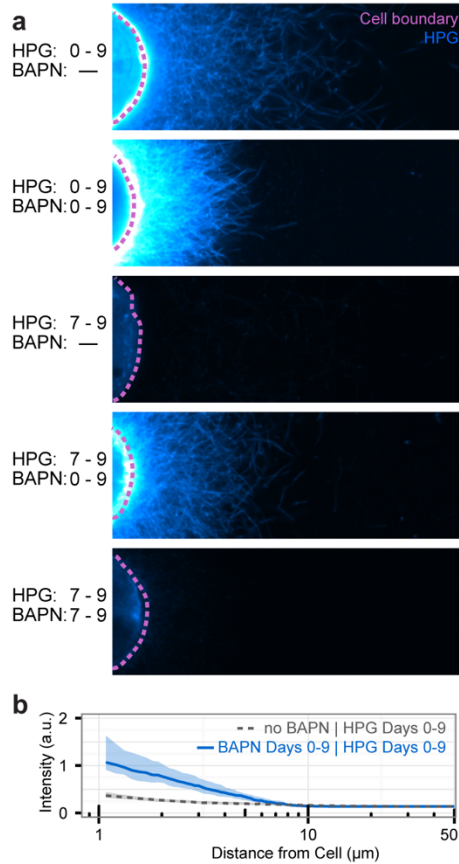

**Figure S7: Exposure to BAPN increases nascent matrix synthesis.** (a) Continuous and pulse labeling (final 2 days) of chondrocytes cultured in the presence and absence of BAPN, a collagen cross-linking enzyme inhibitor. Pulse labeled cells are the same cells shown in Figure 5, visualized here using the same imaging settings as the continuously labeled groups. (b) Radial intensity profiles of chondrocytes continuously labeled with HPG for 9 days in the presence and absence of BAPN. Lines represent median intensity profile, shaded areas represent 25<sup>th</sup> to 75<sup>th</sup> percentiles (n = 20 cells/group).



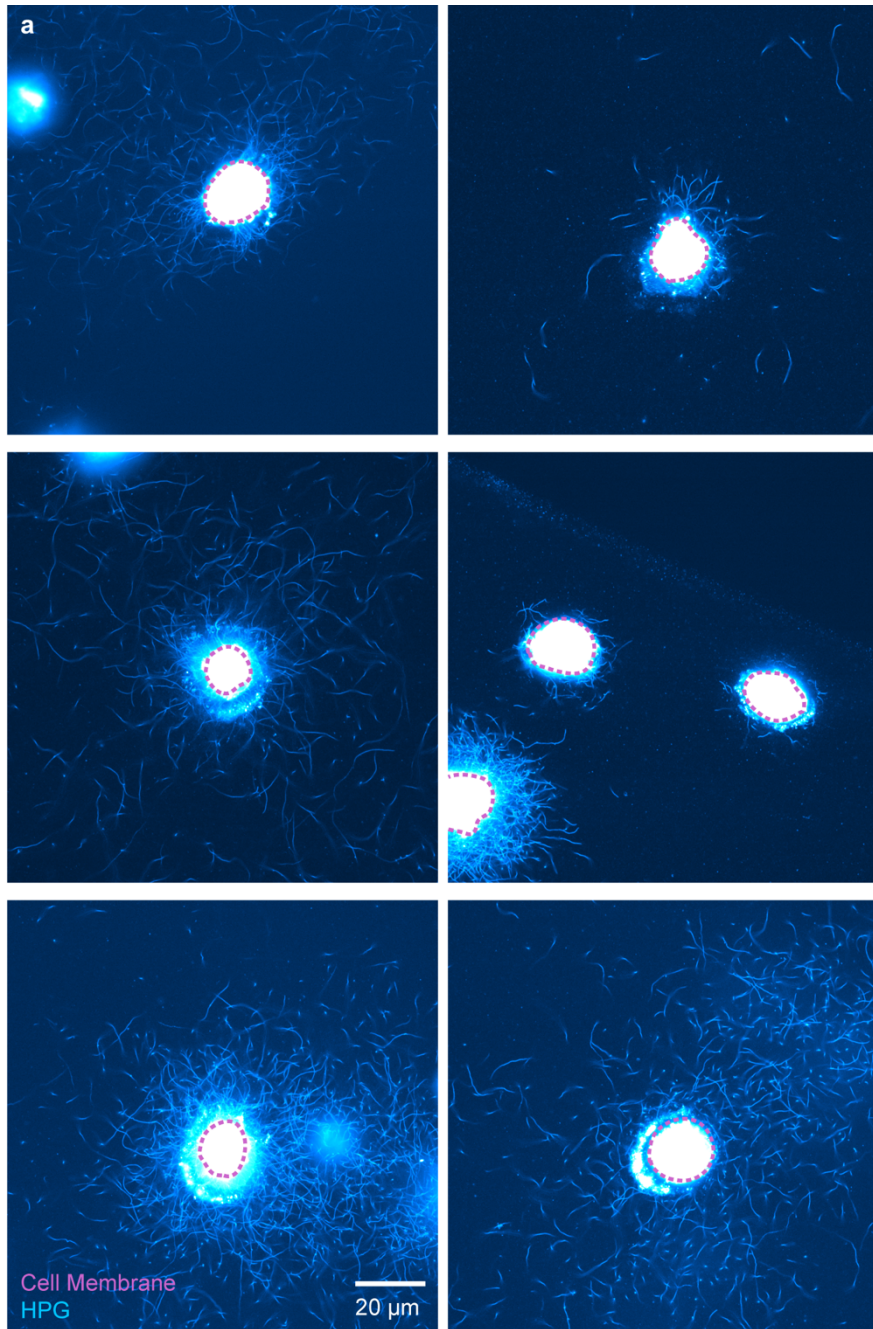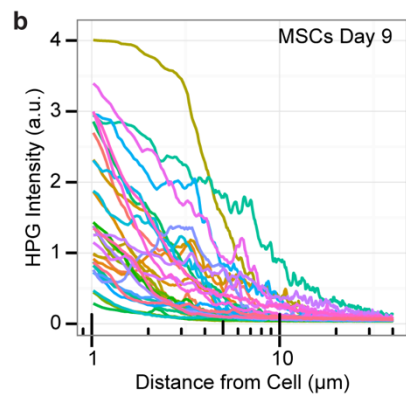

**Figure S8: Cell-to-cell heterogeneity in HPG-labeled nascent matrix formed by mesenchymal stem cells (MSCs).** (a) A panel of representative MSCs cultured in agarose and labeled with HPG continuously for 9 days. (b) Radial intensity profiles for 20 individual MSCs cultured and labeled for 9 days.
